# Supplementary material
Source: PubMed Central journal article supplement (PMC3174780)
Supplement: NIHMS262415-supplement-Figure_S1.pdf [file NIHMS262415-supplement-Figure_S1.pdf]

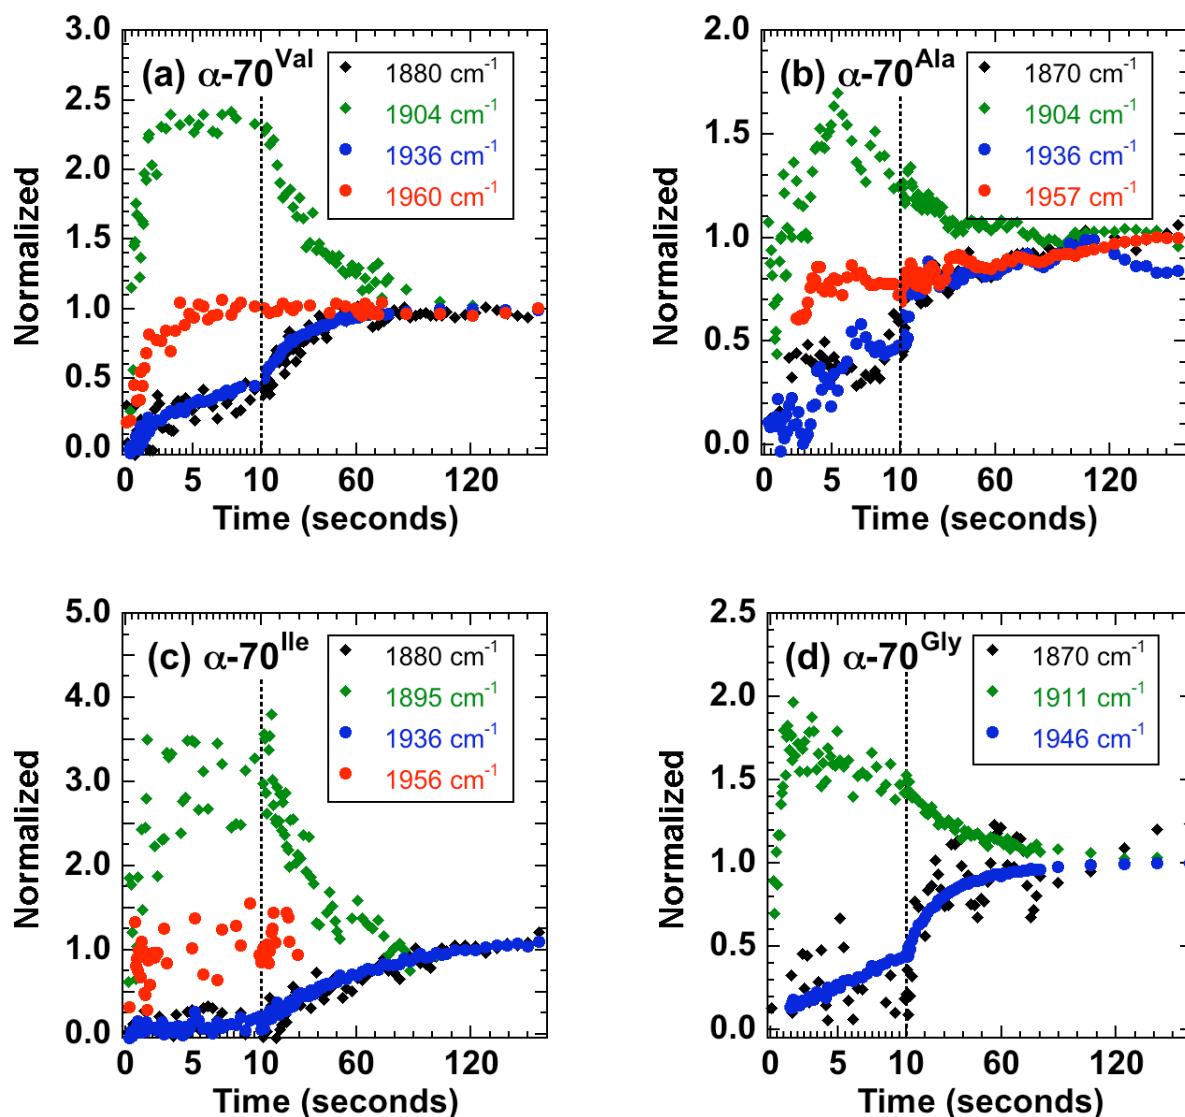

**Figure S1.** Time courses from transient IR spectra of the *A. vinelandii* MoFe nitrogenase hi-CO complex showing the effect of varying the size of the  $\alpha$ -70 sidechain. Spectra are in figure 2a.

(a) Wild-type ( $\alpha$ -70<sup>Val</sup>) measured at 1880, 1904, 1936, 1960  $\text{cm}^{-1}$ . This is the same as figure 2b.

(b)  $\alpha$ -70<sup>Ala</sup> at 1870, 1904, 1936, 1957  $\text{cm}^{-1}$ .

(c)  $\alpha$ -70<sup>Ile</sup> at 1880, 1895, 1936, 1956  $\text{cm}^{-1}$ . The band at 1956  $\text{cm}^{-1}$  was obscured by the 1936  $\text{cm}^{-1}$  band at long times.

(d)  $\alpha$ -70<sup>Gly</sup> at 1870, 1911, 1946  $\text{cm}^{-1}$ .

Intensities in are normalized at (a-c) 150 s or (d) 120 s.
